# Supplementary material
Source: publisher figshare collection journal article supplement (https://tandf.figshare.com/ndownloader/files/30775280)
Supplement: Supplementary file 1 [file 30775280]

# SUPPLEMENTARY DATA

## New natural furfural derivatives from the leaves and stems of *Pogostemon cablin*

Yuanhao Wang<sup>†</sup>, Longzhen Ding<sup>†</sup>, Qing Hu<sup>\*</sup>, and Chao Wang<sup>\*</sup>

*SUSTech Engineering Innovation Center, School of Environmental Science and Engineering, Southern University of Science and Technology, Shenzhen 518055, China*

\*Corresponding author:

E-mail: huq@sustech.edu.cn (Q. Hu); Tel/Fax: (86)755-88018007;

E-mail: wangchaoshirley@sustech.edu.cn (C. Wang); Tel/Fax: (86)755-88010322

<sup>†</sup>These authors contributed equally to this work.

### ABSTRACT

A new furfural derivative, pogoscafuran A (**1**), a new natural product, HMF levulinate (**2**), together with four known compounds (**3–6**) were isolated from an extract of the leaves and stems of *Pogostemon cablin* (Blanco) Benth. Their structures were elucidated on the basis of extensive spectroscopic analyses and single-crystal X-ray crystallography. Compound **1** was the first example of natural furfural derivative with a unique C5–C1' linkage between a molecule of furfural and 3-methyl-2-cyclopentenone moiety. The plausible biogenetic pathway for the new compound **1** was proposed. All these isolated compounds were tested for their inhibitory effects on the nitric oxide (NO) production induced by lipopolysaccharide in RAW264.7 cells, and only compound **1** exhibited weak inhibitory activity.

**Keywords:** *Pogostemon cablin*; Labiatae; furfural derivatives; single-crystal X-ray crystallography

## List of Content

**Scheme S1.** Plausible biosynthetic pathway of compound **1**.

**Figure S1.** Key  $^1\text{H}$ – $^1\text{H}$  COSY and HMBC correlations of compounds **1** and **2**.

**Figure S2.** X-ray crystallographic structure of compound **1**.

**Figure S3.**  $^1\text{H}$  NMR (400 MHz) spectrum of compound **1** in  $\text{CDCl}_3$ .

**Figure S4.**  $^{13}\text{C}$  NMR and DEPT 135 (100 MHz) spectra of compound **1** in  $\text{CDCl}_3$ .

**Figure S5.** HSQC spectrum of compound **1** in  $\text{CDCl}_3$ .

**Figure S6.** HMBC spectrum of compound **1** in  $\text{CDCl}_3$ .

**Figure S7.**  $^1\text{H}$ – $^1\text{H}$  COSY spectrum of compound **1** in  $\text{CDCl}_3$ .

**Figure S8.** HRESIMS spectrum of compound **1**.

**Figure S9.**  $^1\text{H}$  NMR (400 MHz) spectrum of compound **2** in  $\text{CDCl}_3$ .

**Figure S10.**  $^{13}\text{C}$  NMR and DEPT 135 (100 MHz) spectra of compound **2** in  $\text{CDCl}_3$ .

**Figure S11.** HSQC spectrum of compound **2** in  $\text{CDCl}_3$ .

**Figure S12.** HMBC spectrum of compound **2** in  $\text{CDCl}_3$ .

**Figure S13.**  $^1\text{H}$ – $^1\text{H}$  COSY spectrum of compound **2** in  $\text{CDCl}_3$ .

**Figure S14.** HRESIMS spectrum of compound **2**.

**Figure S15.**  $^1\text{H}$  NMR (400 MHz) spectrum of compound **3** in  $\text{CDCl}_3$ .

**Figure S16.**  $^{13}\text{C}$  NMR (100 MHz) spectrum of compound **3** in  $\text{CDCl}_3$ .

**Figure S17.**  $^1\text{H}$  NMR (400 MHz) spectrum of compound **4** in  $\text{CDCl}_3$ .

**Figure S18.**  $^{13}\text{C}$  NMR (100 MHz) spectrum of compound **4** in  $\text{CDCl}_3$ .

**Figure S19.**  $^1\text{H}$  NMR (400 MHz) spectrum of compound **5** in  $\text{CDCl}_3$ .

**Figure S20.**  $^{13}\text{C}$  NMR (100 MHz) spectrum of compound **5** in  $\text{CDCl}_3$ .

**Figure S21.**  $^1\text{H}$  NMR (400 MHz) spectrum of compound **6** in  $\text{CDCl}_3$ .

**Figure S22.**  $^{13}\text{C}$  NMR (100 MHz) spectrum of compound **6** in  $\text{CDCl}_3$ .

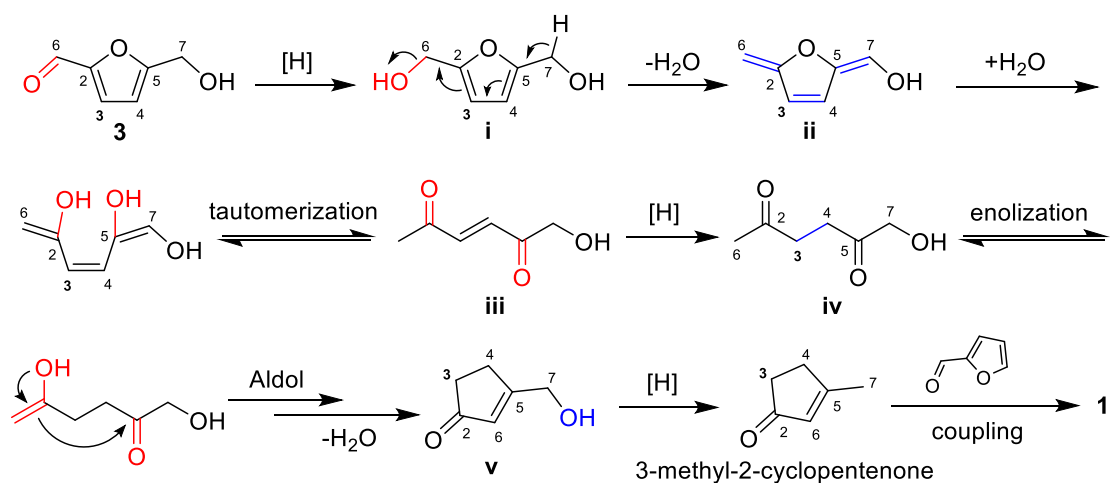

**Scheme S1.** Plausible biosynthetic pathway of compound **1**.

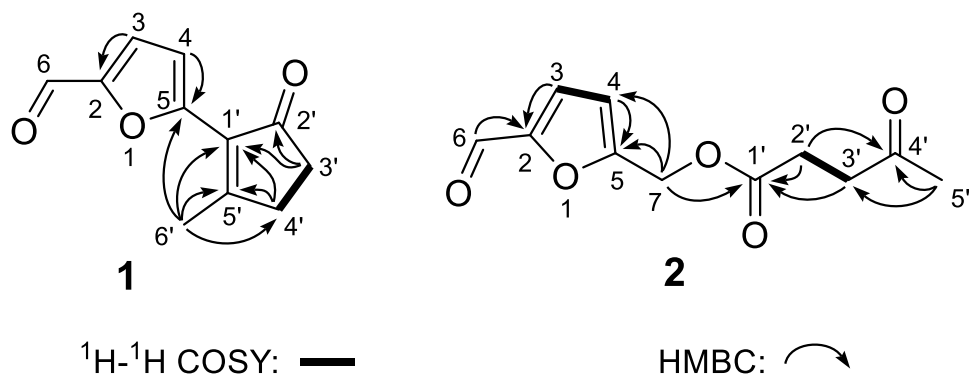

**Figure S1.** Key  $^1H$ - $^1H$  COSY and HMBC correlations of compounds **1** and **2**.

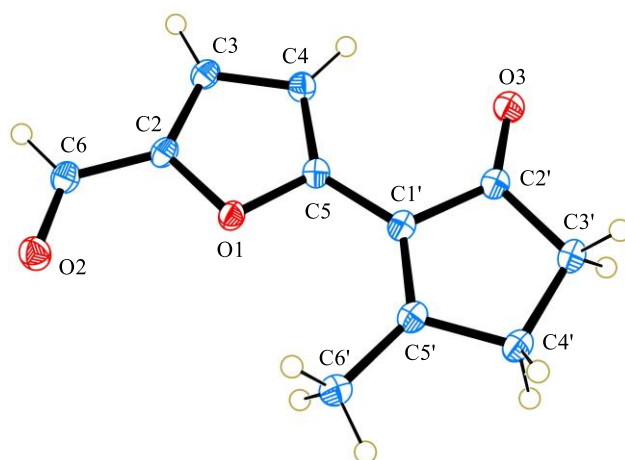

**Figure S2.** X-ray crystallographic structure of compound **1**.

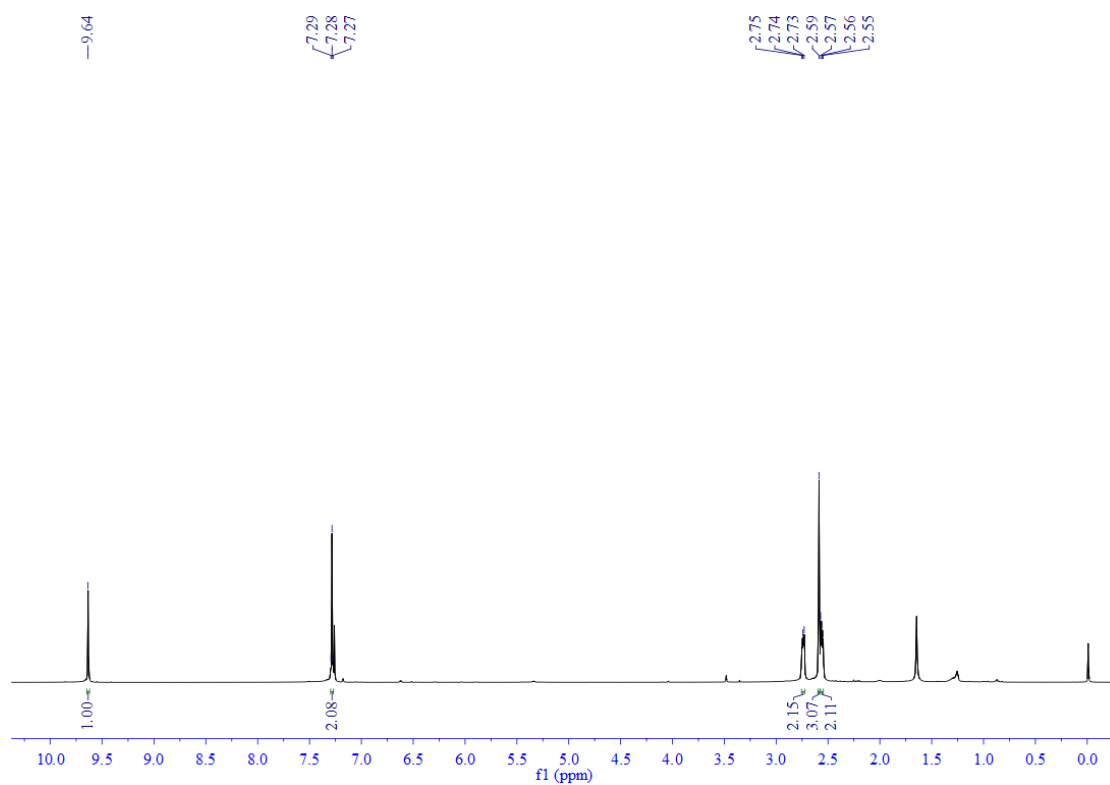

**Figure S3.**  $^1\text{H}$  NMR (400 MHz) spectrum of compound **1** in  $\text{CDCl}_3$ .

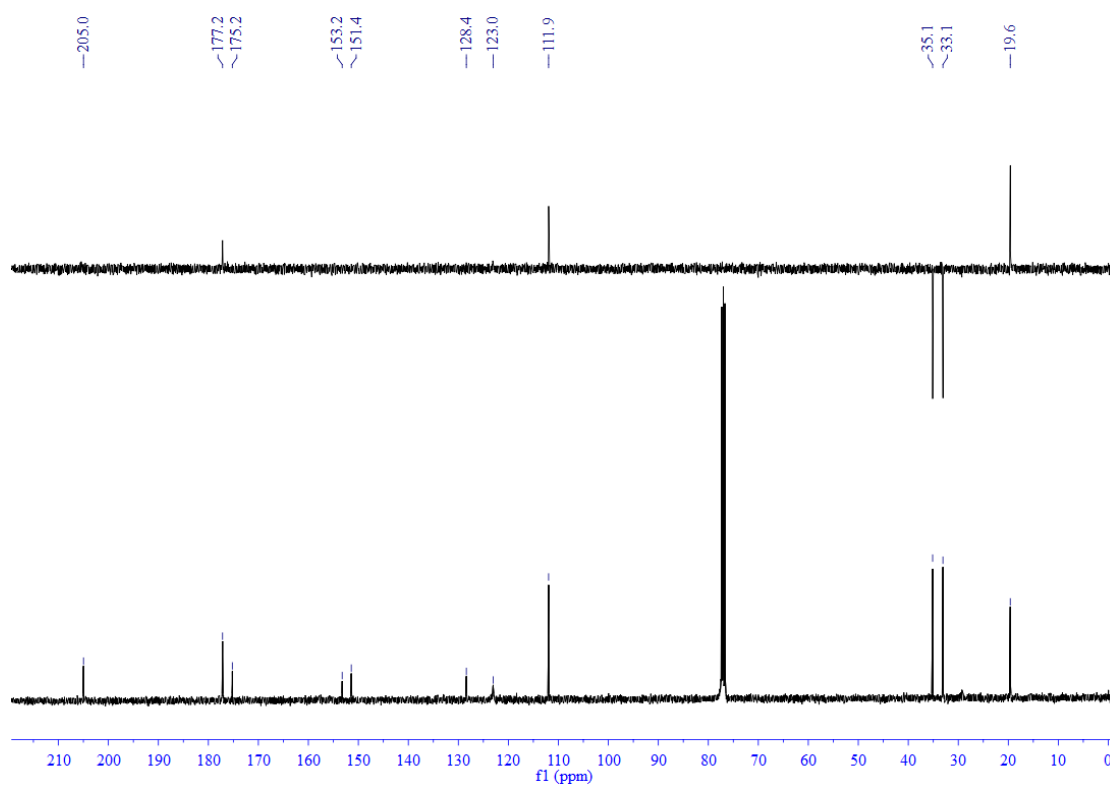

**Figure S4.**  $^{13}\text{C}$  NMR and DEPT 135 (100 MHz) spectra of compound **1** in  $\text{CDCl}_3$ .

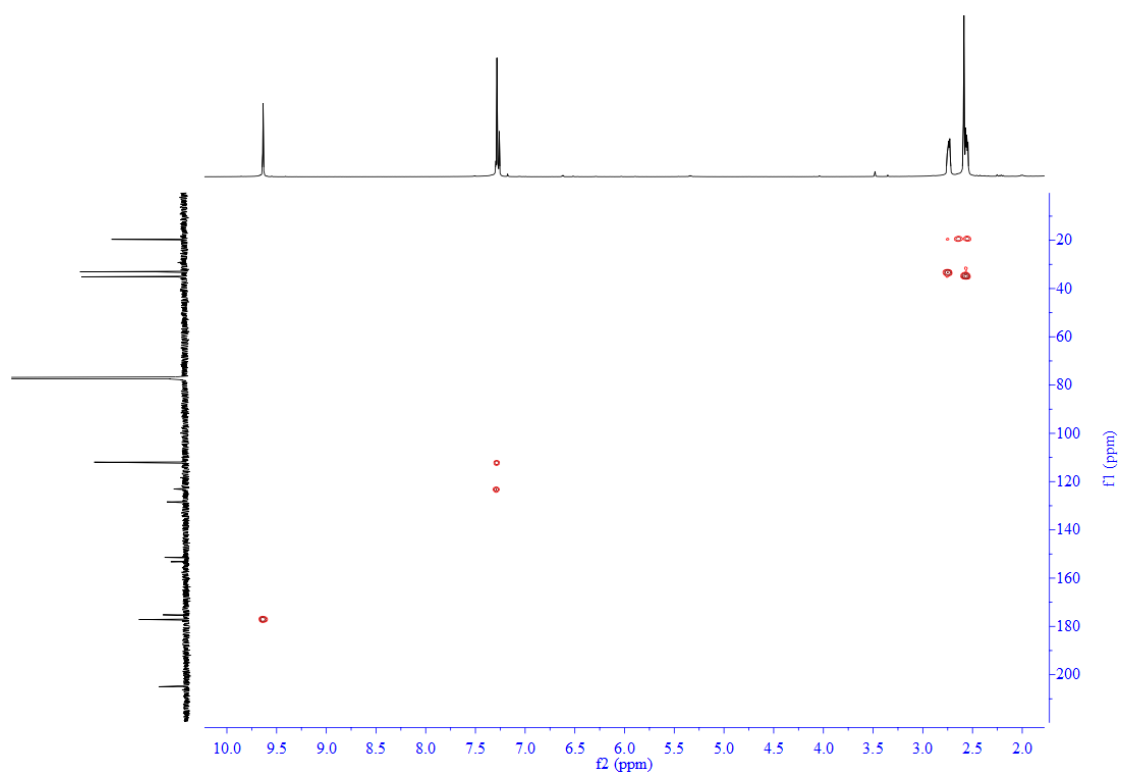

**Figure S5.** HSQC spectrum of compound **1** in CDCl<sub>3</sub>.

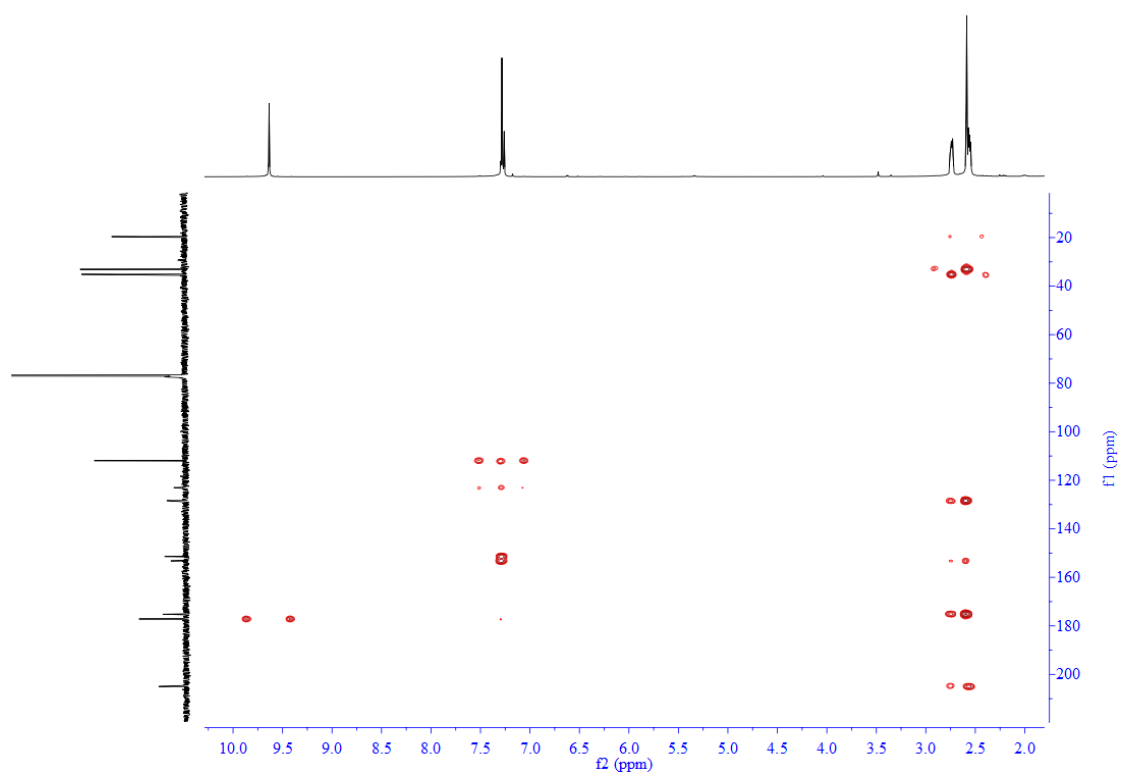

**Figure S6.** HMBC spectrum of compound **1** in CDCl<sub>3</sub>.

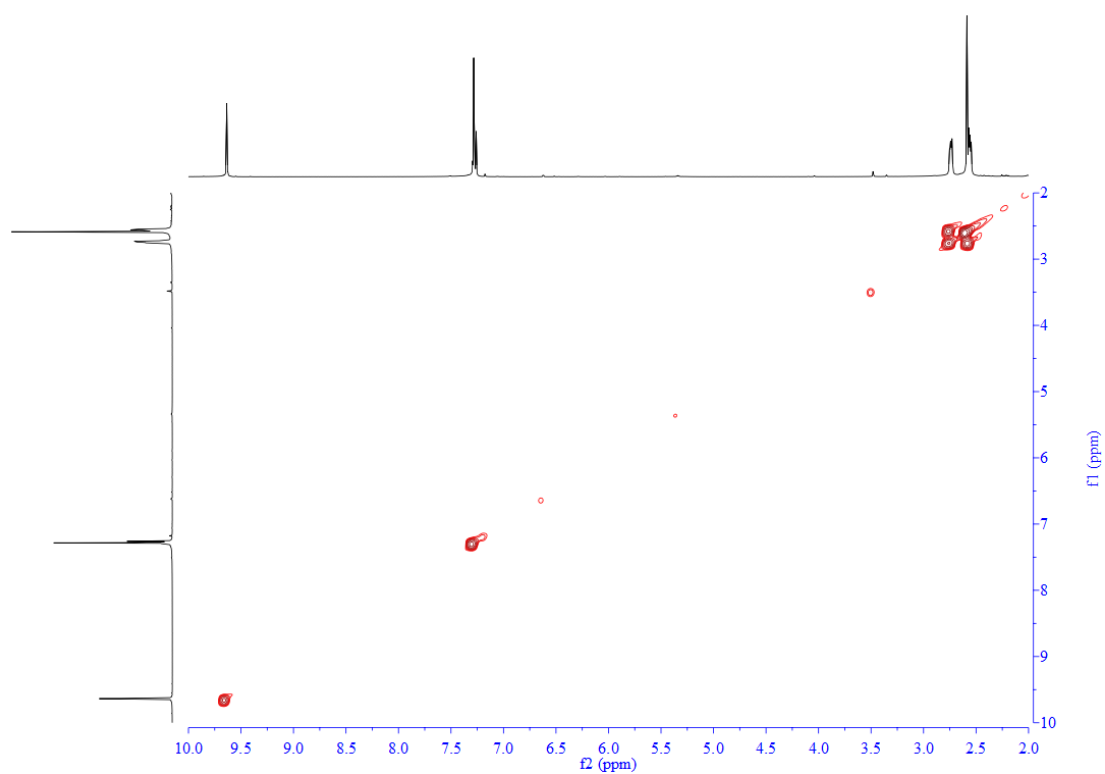

**Figure S7.**  $^1\text{H}$ - $^1\text{H}$  COSY spectrum of compound **1** in  $\text{CDCl}_3$ .

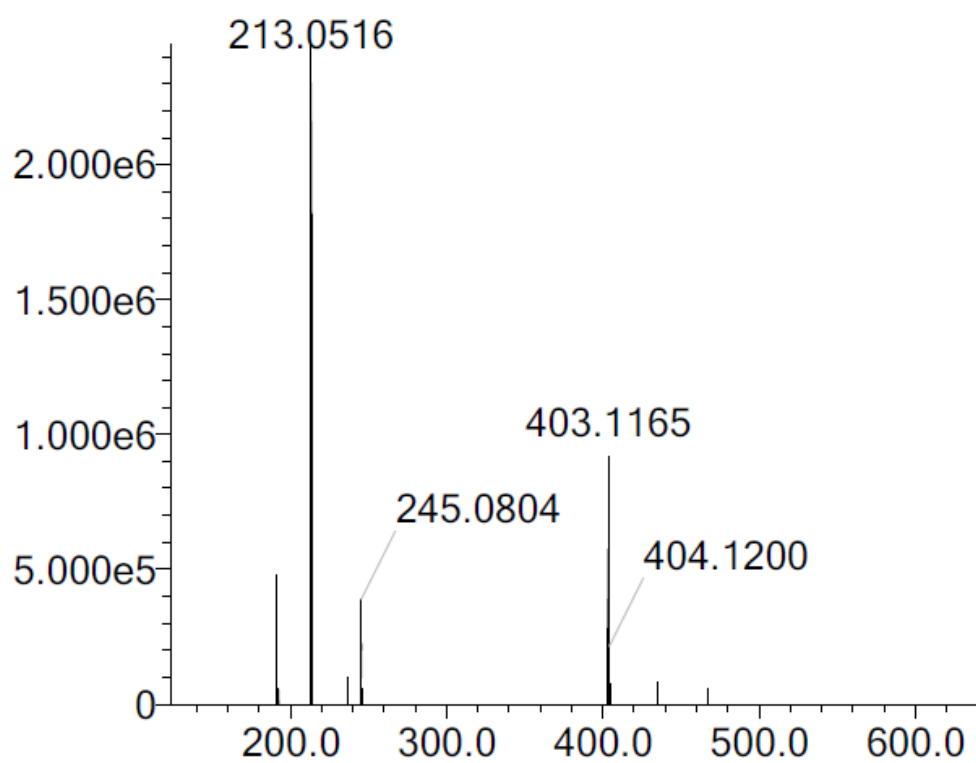

**Figure S8.** HRESIMS spectrum of compound **1**.

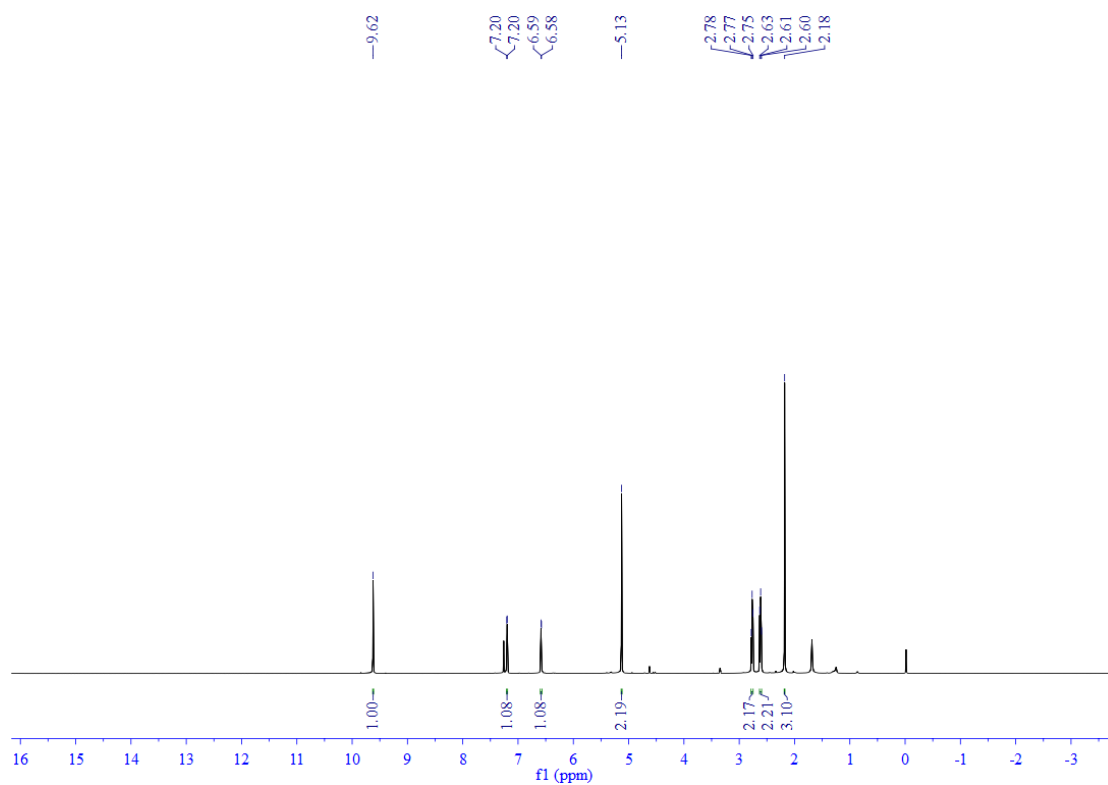

**Figure S9.** <sup>1</sup>H NMR (400 MHz) spectrum of compound **2** in CDCl<sub>3</sub>.

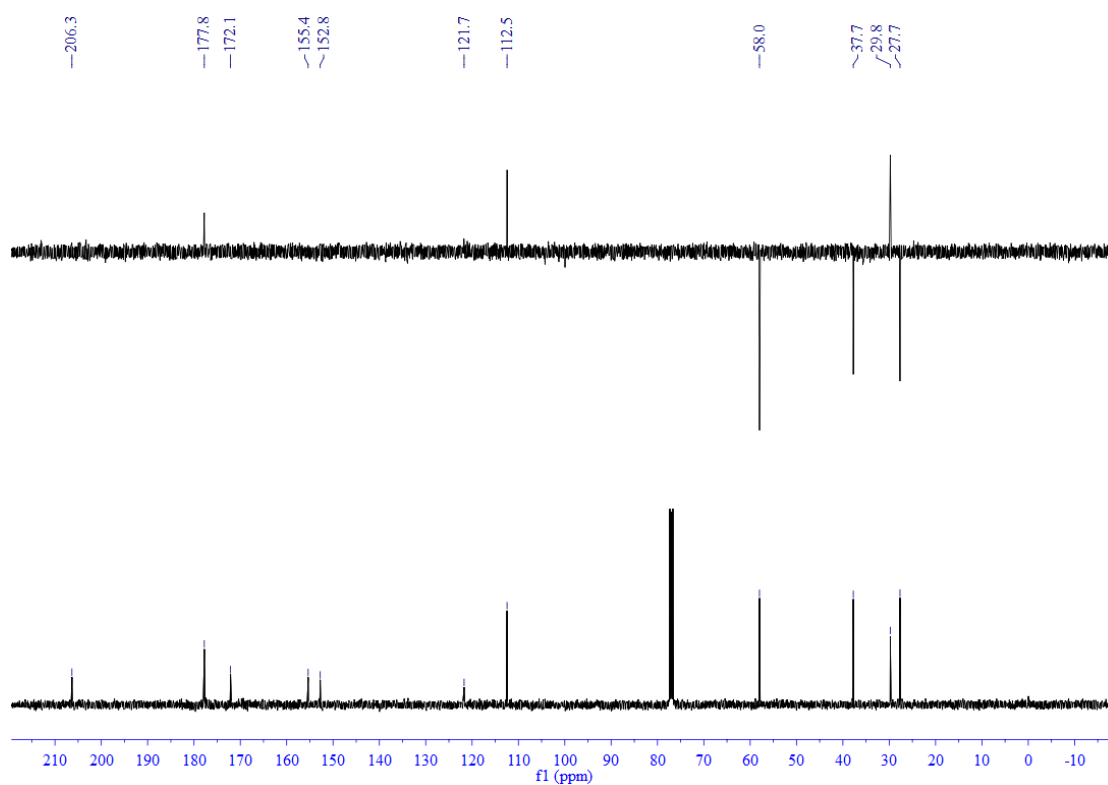

**Figure S10.** <sup>13</sup>C NMR and DEPT 135 (100 MHz) spectra of compound **2** in CDCl<sub>3</sub>.

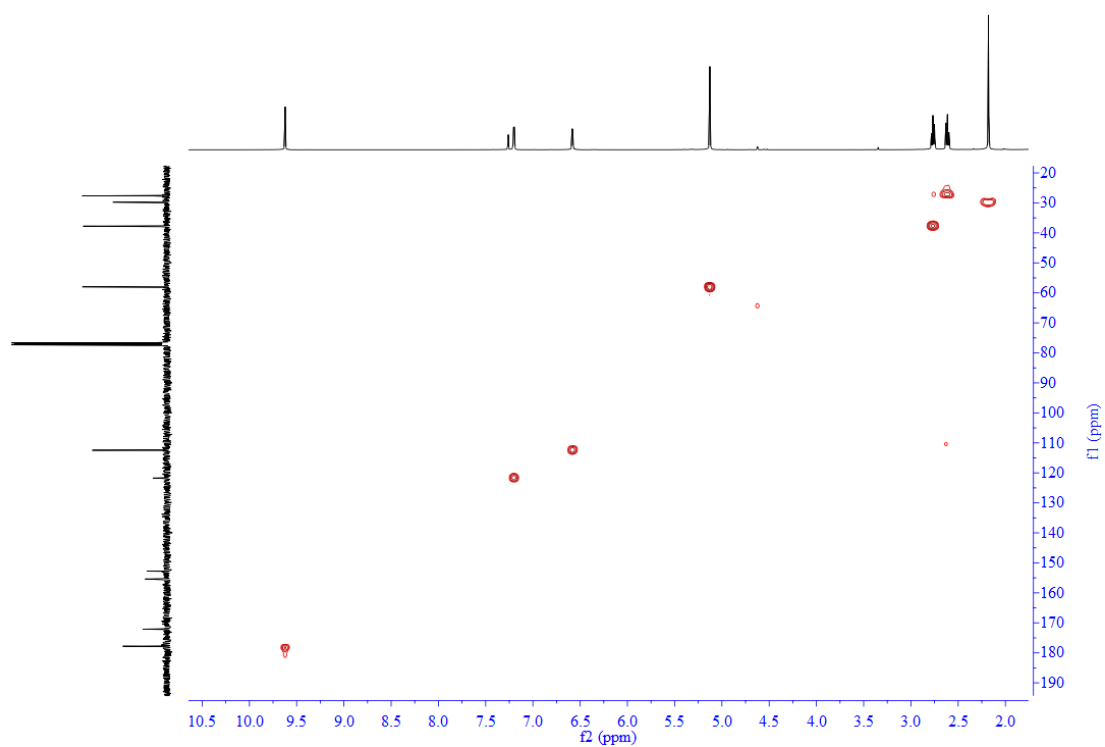

**Figure S11.** HSQC spectrum of compound **2** in CDCl<sub>3</sub>.

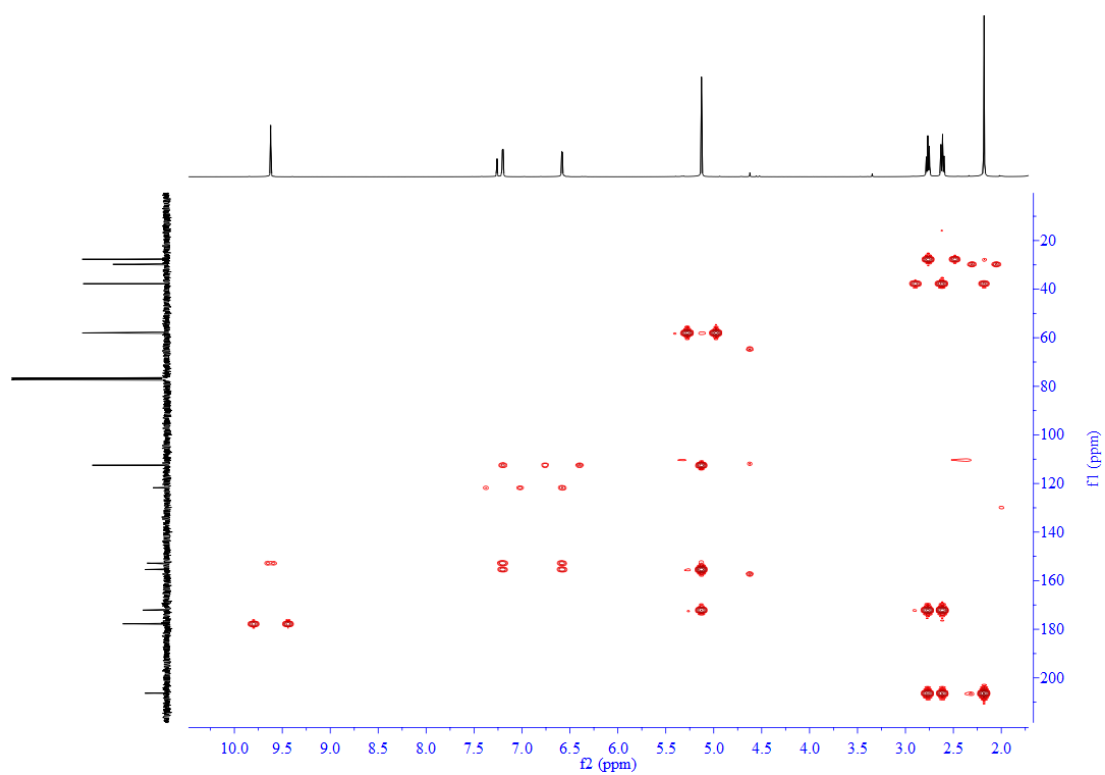

**Figure S12.** HMBC spectrum of compound **2** in CDCl<sub>3</sub>.



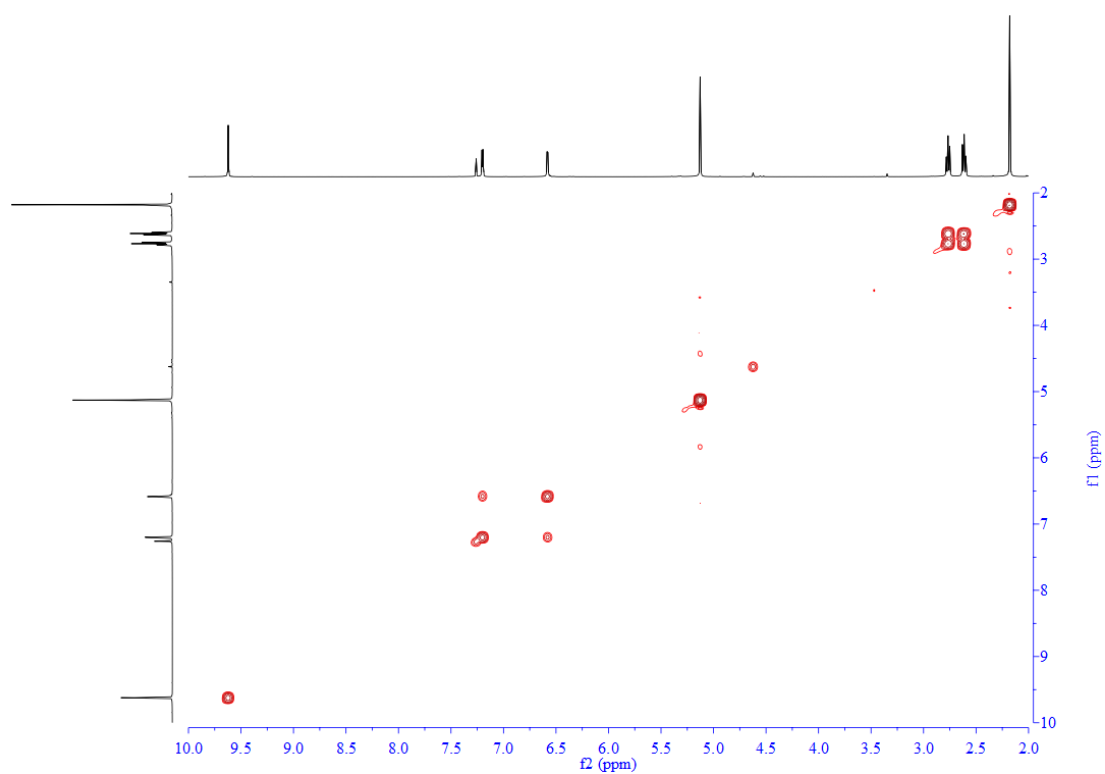

**Figure S13.**  $^1\text{H}$ – $^1\text{H}$  COSY spectrum of compound **2** in  $\text{CDCl}_3$ .

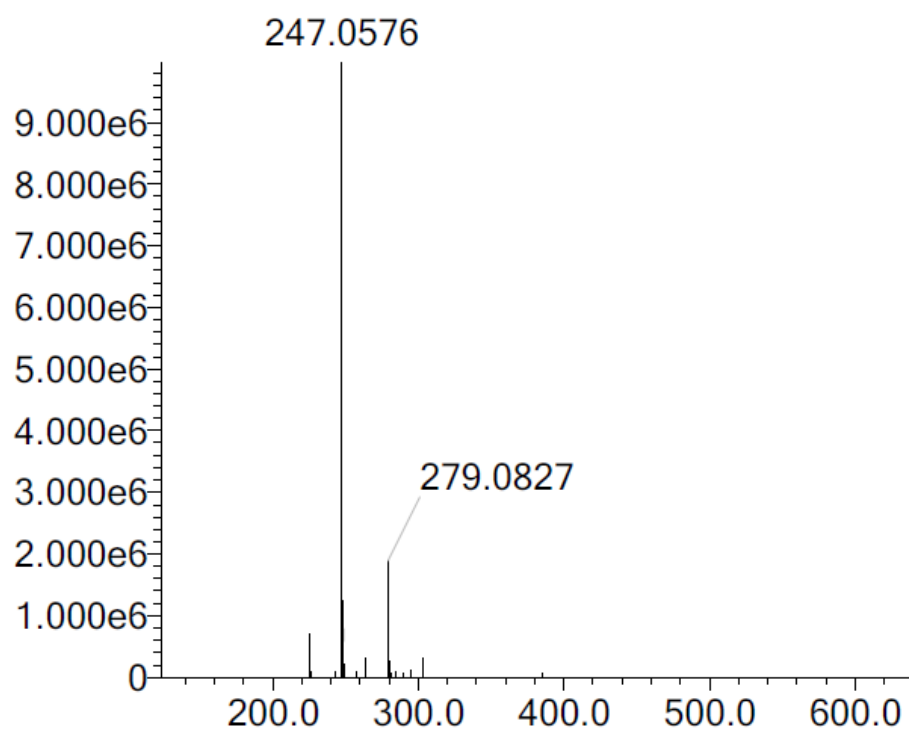

**Figure S14.** HRESIMS spectrum of compound **2**.

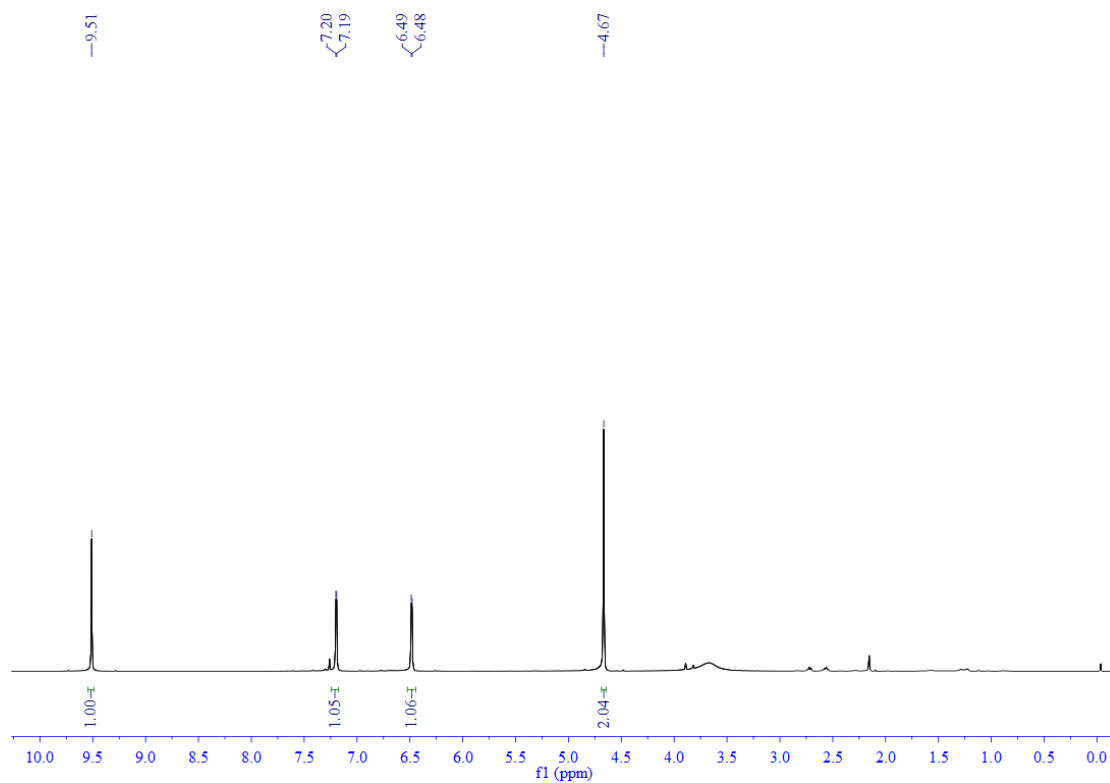

**Figure S15.**  $^1\text{H}$  NMR (400 MHz) spectrum of compound **3** in  $\text{CDCl}_3$ .

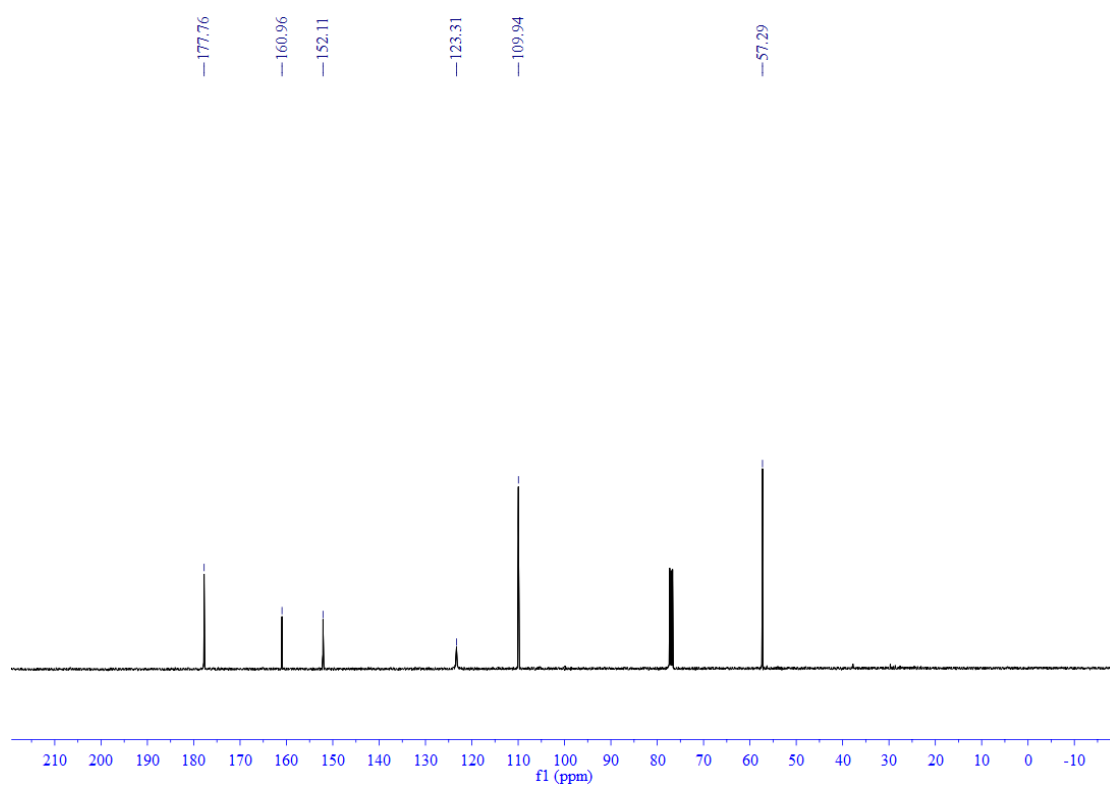

**Figure S16.**  $^{13}\text{C}$  NMR (100 MHz) spectrum of compound **3** in  $\text{CDCl}_3$ .

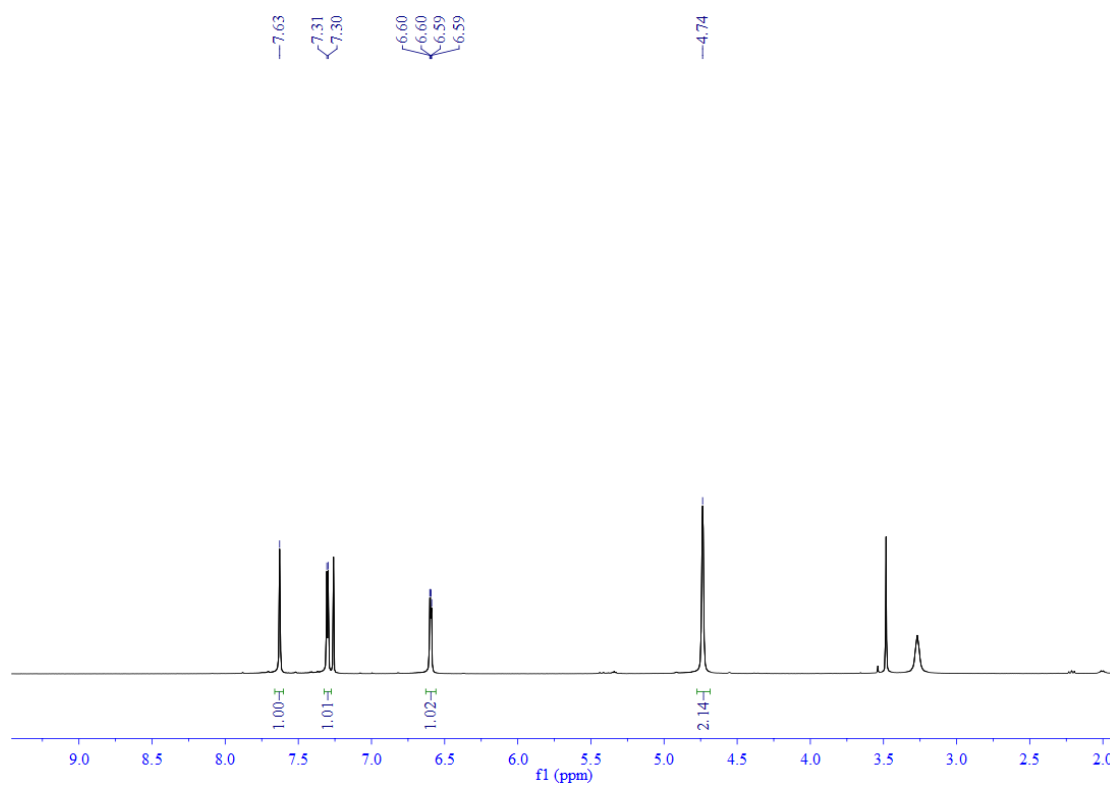

**Figure S17.**  $^1\text{H}$  NMR (400 MHz) spectrum of compound **4** in  $\text{CDCl}_3$ .

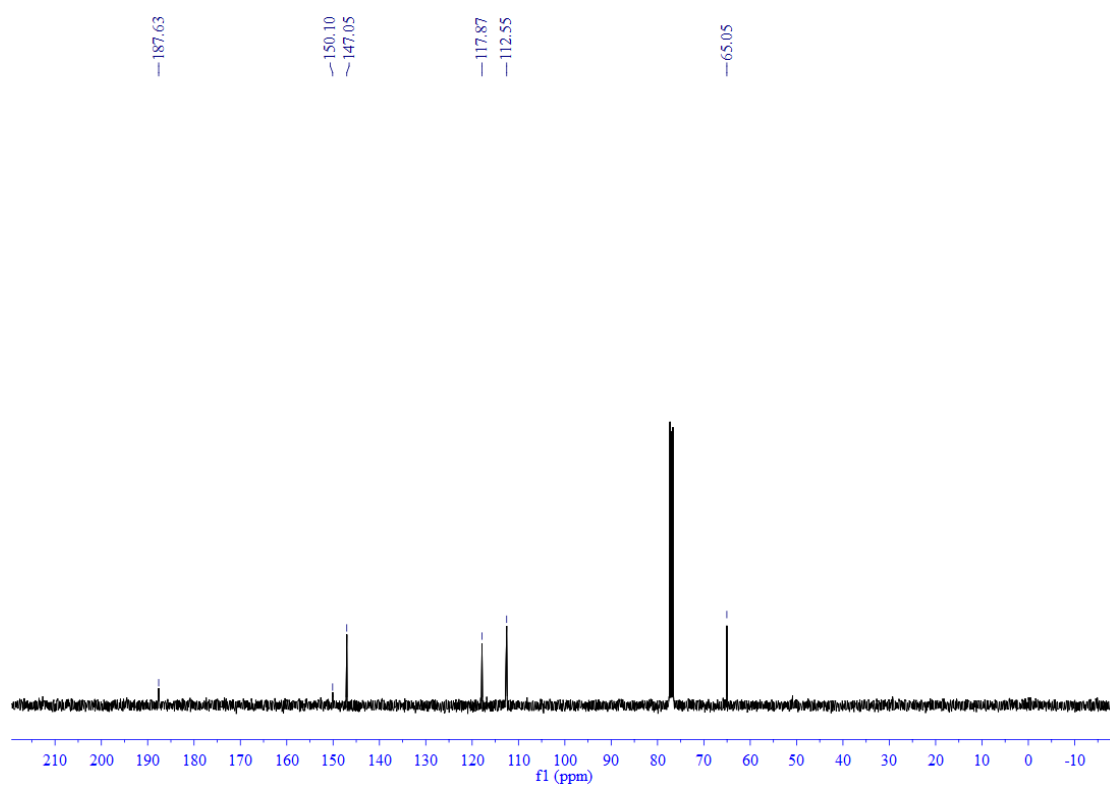

**Figure S18.**  $^{13}\text{C}$  NMR (100 MHz) spectrum of compound **4** in  $\text{CDCl}_3$ .

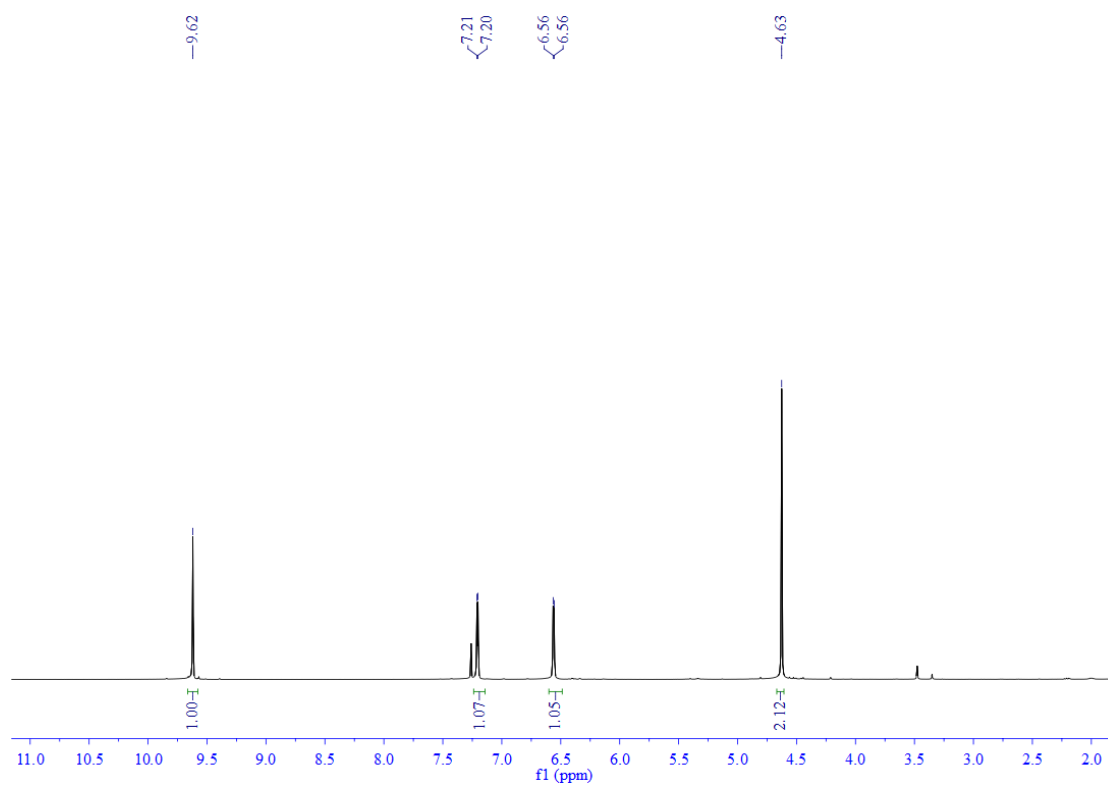

**Figure S19.** <sup>1</sup>H NMR (400 MHz) spectrum of compound **5** in CDCl<sub>3</sub>.

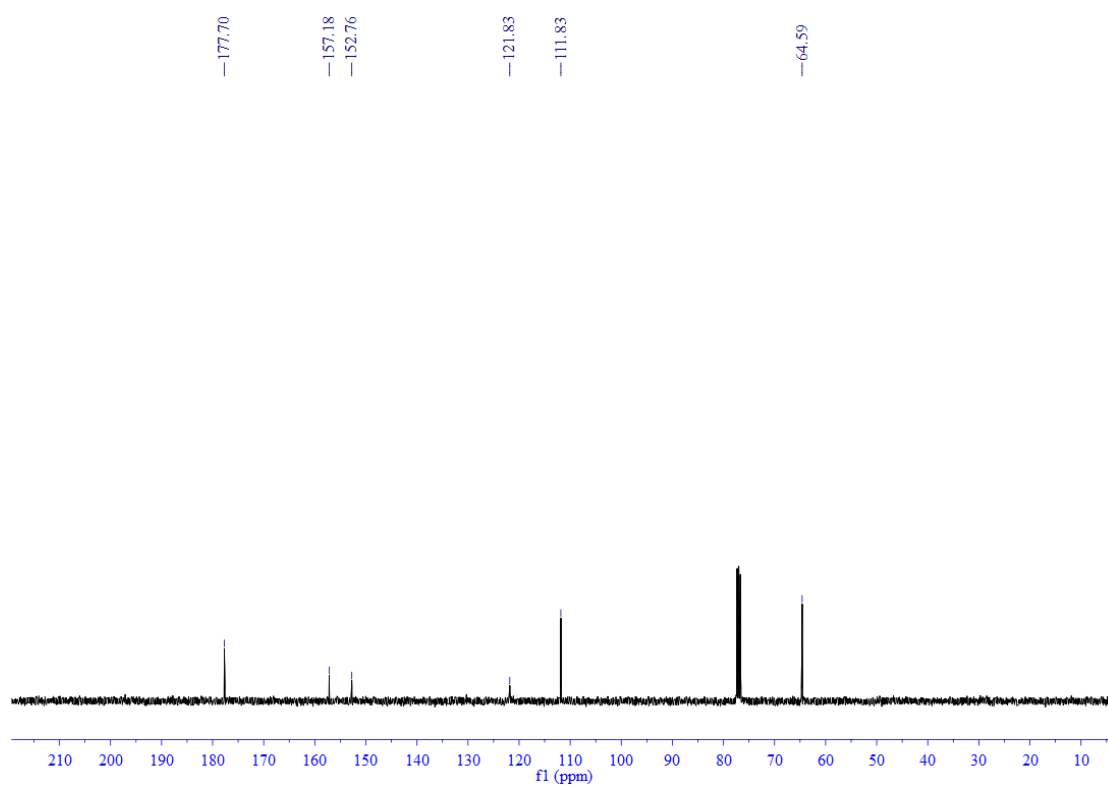

**Figure S20.** <sup>13</sup>C NMR (100 MHz) spectrum of compound **5** in CDCl<sub>3</sub>.

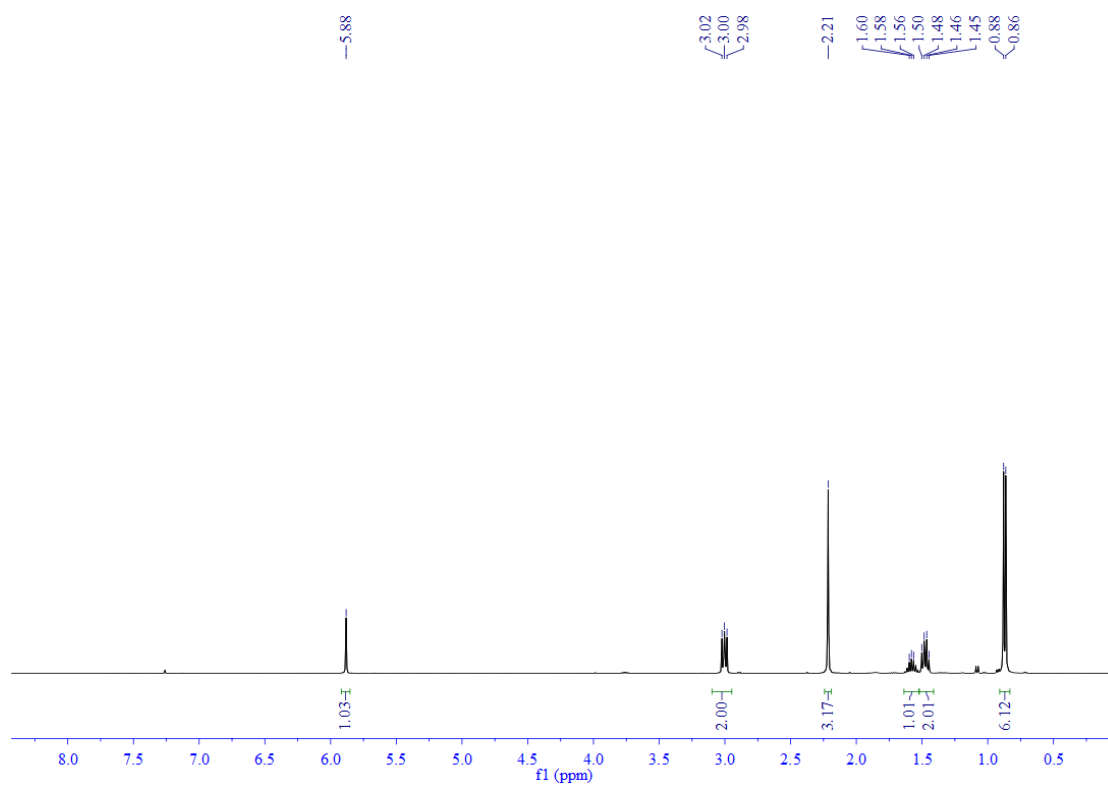

**Figure S21.** <sup>1</sup>H NMR (400 MHz) spectrum of compound **6** in CDCl<sub>3</sub>.

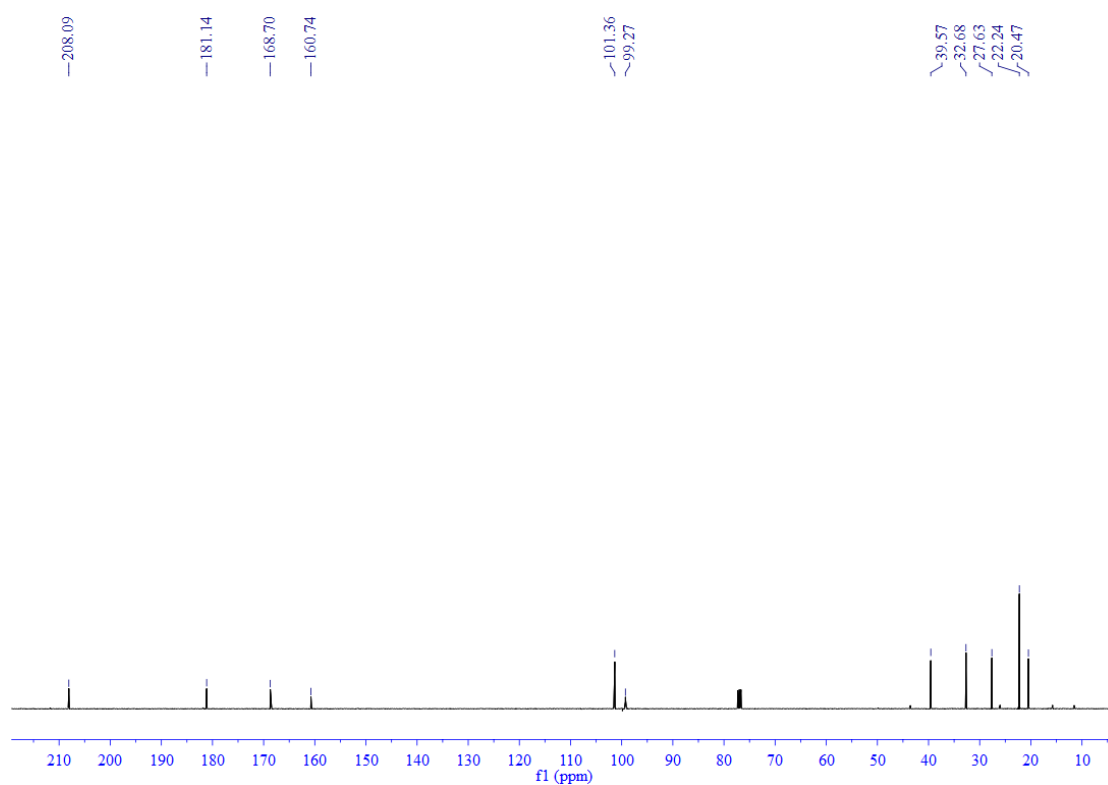

**Figure S22.** <sup>13</sup>C NMR (100 MHz) spectrum of compound **6** in CDCl<sub>3</sub>.
